# Supplementary material for: Predominant Single Stable VpmaV Expression in Strain GM139 and Major Differences with Mycoplasma agalactiae Type Strain PG2
Source: MDPI journal article supplement (doi:10.3390/ani12030265), 2022-01-21
Supplement: s1 [file s1]

## Supplementary Materials

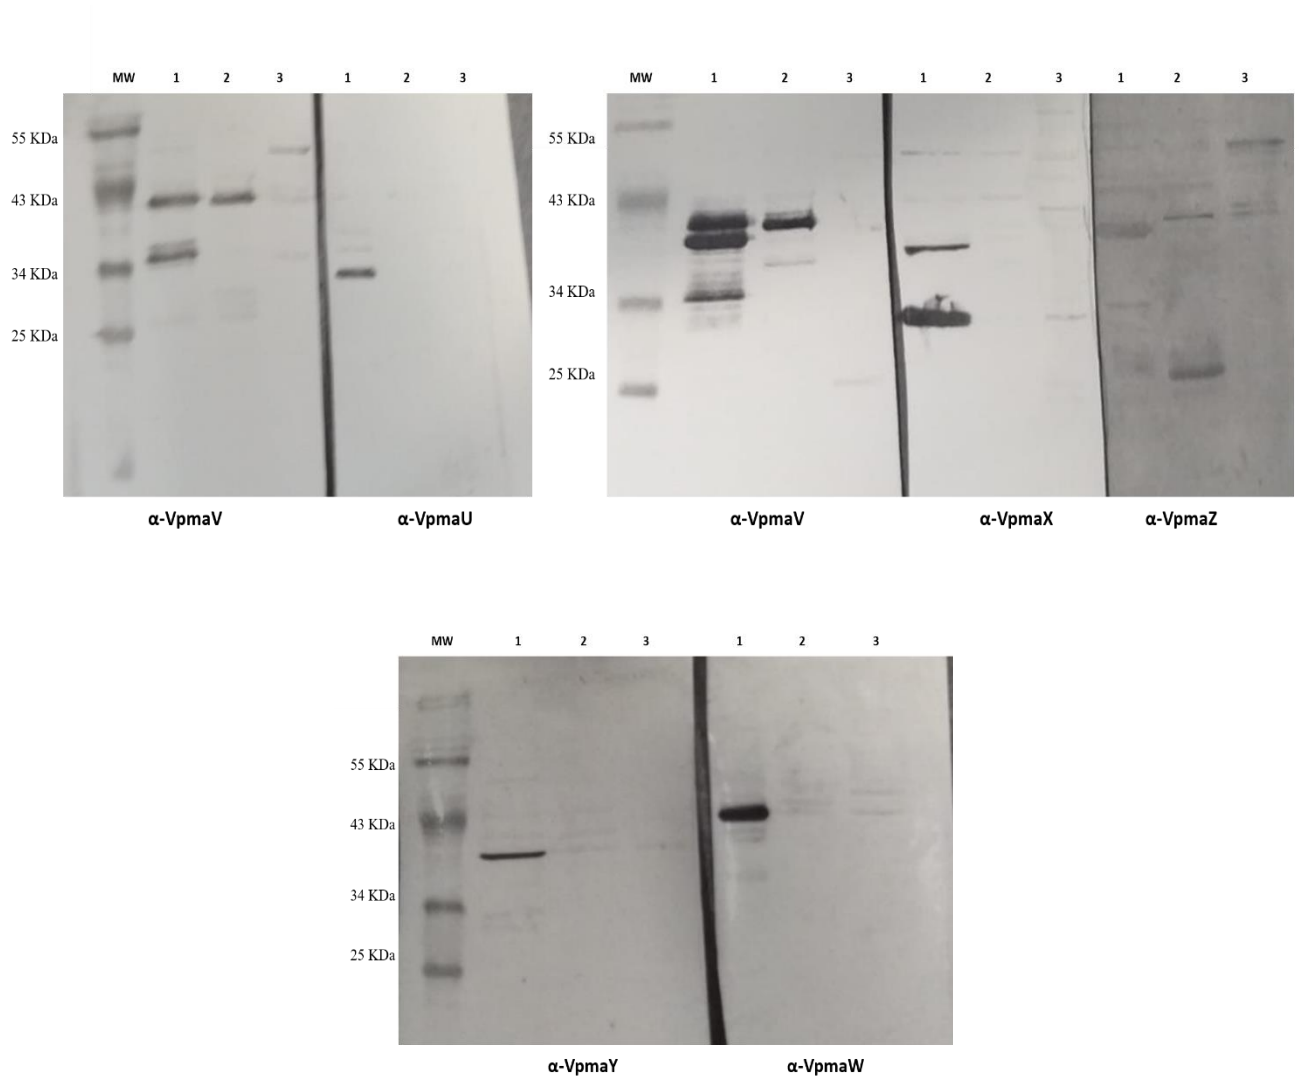

**Figure S1.** Whole Western blot analysis demonstrating recognition of Vpmas by mono-specific Vpma antisera after extraction of lipoprotein fractions by Triton X-114. Lane 1: *M. agalactiae* strain PG2; Lane 2: *M. agalactiae* strain GM139; Lane 3: *M. gallisepticum* (negative control); MW: molecular weight protein marker.

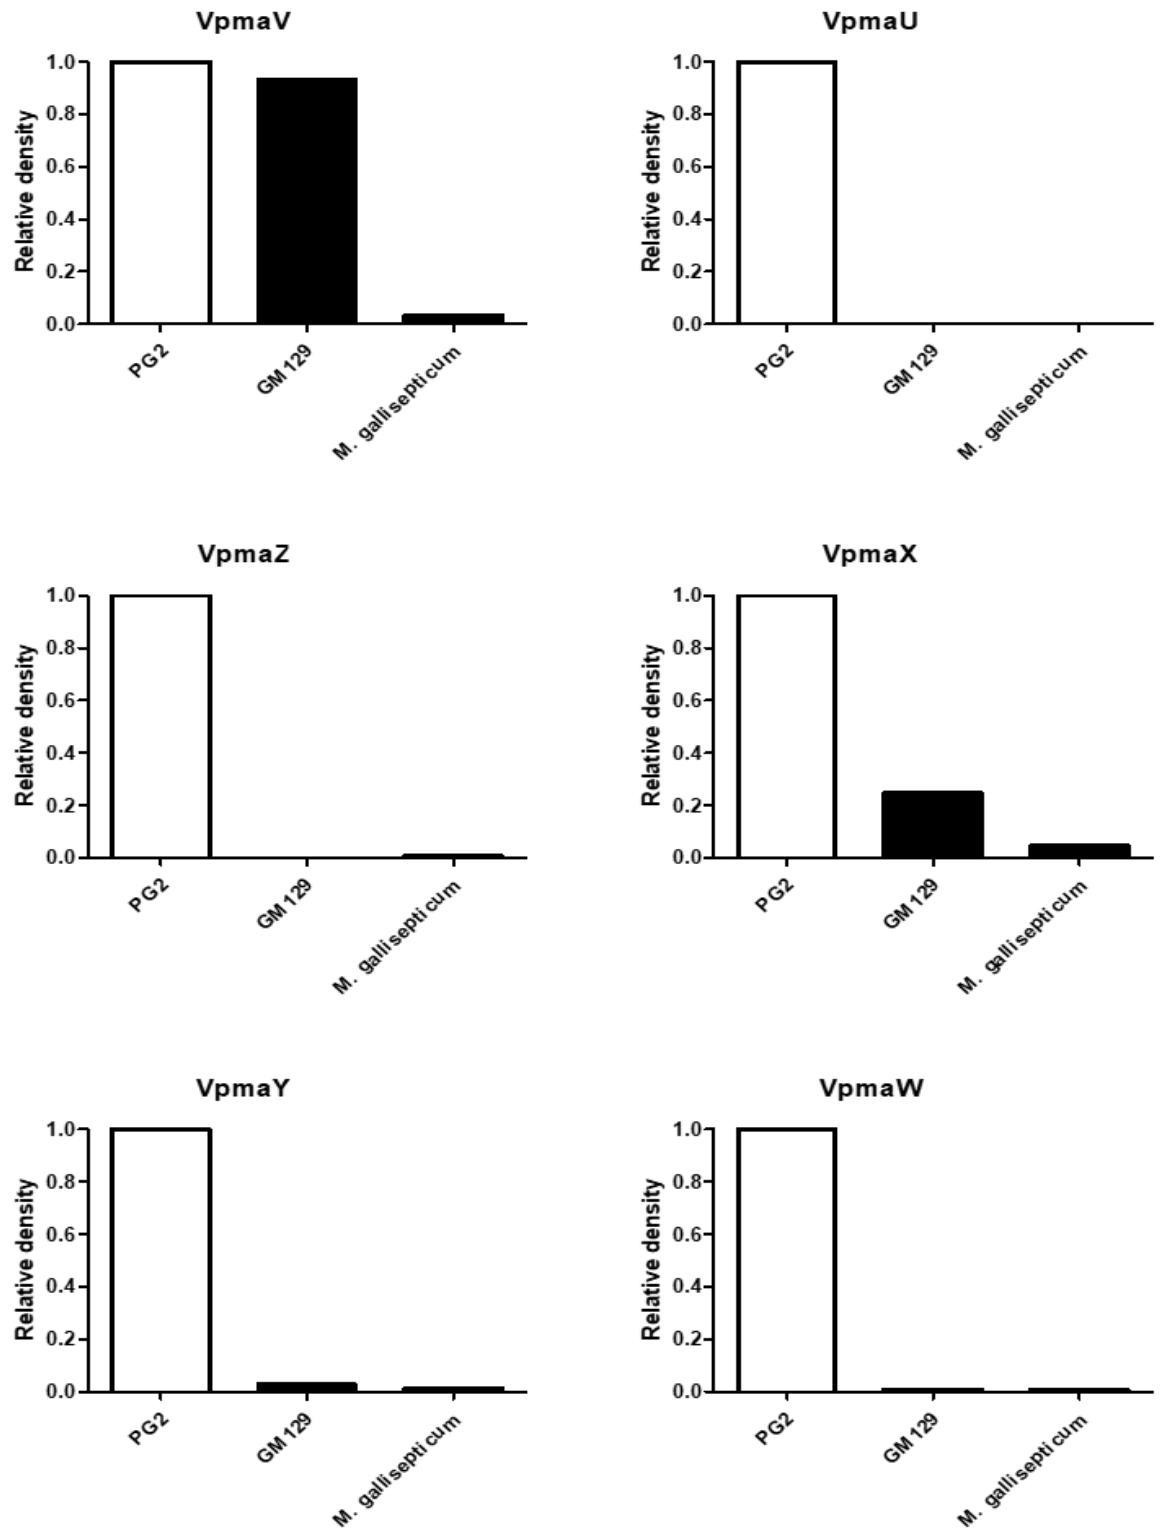

**Figure S2.** Densitometric analyses using ImageJ software. Western blotting band densities of Vpmas presented in Figure 1B. Each band densities were quantified as a ratio to Vpma from PG2 strain.
